# Supplementary material for: A prognostic biomarker CENPW and its relationship to immune infiltrations in clear cell renal cell carcinoma
Source: Research Square preprint supplement (doi:10.21203/rs.3.rs-2715408/v1), 2023-03-23
Supplement: Supplementary file 1 [file 3f901fd42d320e5445e522d3.docx]

Table4: Univariate and multivariate analyses of clinical pathological parameters in ccRCC patients.

| Characteristics | Total(N) | Univariate analysis | |  | Multivariate analysis | |
| --- | --- | --- | --- | --- | --- | --- |
| Hazard ratio (95% CI) | P value | Hazard ratio (95% CI) | P value |
| Age | 539 |  |  |  |  |  |
| <=60 | 269 | Reference |  |  |  |  |
| >60 | 270 | 1.765 (1.298-2.398) | **<0.001** |  | 1.608 (1.038-2.490) | **0.033** |
| Gender | 539 |  |  |  |  |  |
| Female | 186 | Reference |  |  |  |  |
| Male | 353 | 0.930 (0.682-1.268) | 0.648 |  | 0.985 (0.635-1.529) | 0.947 |
| Histologic grade | 531 |  |  |  |  |  |
| G1&G2 | 249 | Reference |  |  |  |  |
| G4&G3 | 282 | 2.702 (1.918-3.807) | **<0.001** |  | 1.468 (0.877-2.457) | 0.144 |
| Pathologic stage | 536 |  |  |  |  |  |
| Stage II&Stage I | 331 | Reference |  |  |  |  |
| Stage III&Stage IV | 205 | 3.946 (2.872-5.423) | **<0.001** |  | 1.064 (0.416-2.718) | 0.898 |
| N stage | 257 |  |  |  |  |  |
| N0 | 241 | Reference |  |  |  |  |
| N1 | 16 | 3.453 (1.832-6.508) | **<0.001** |  | 1.449 (0.712-2.950) | 0.307 |
| M stage | 506 |  |  |  |  |  |
| M0 | 428 | Reference |  |  |  |  |
| M1 | 78 | 4.389 (3.212-5.999) | **<0.001** |  | 2.959 (1.742-5.029) | **<0.001** |
| T stage | 539 |  |  |  |  |  |
| T1&T2 | 349 | Reference |  |  |  |  |
| T3&T4 | 190 | 3.228 (2.382-4.374) | **<0.001** |  | 1.573 (0.687-3.603) | 0.284 |
| CENPW | 539 |  |  |  |  |  |
| Low | 269 | Reference |  |  |  |  |
| High | 270 | 2.421 (1.757-3.336) | **<0.001** |  | 2.054 (1.246-3.387) | **0.005** |
