# Supplementary material for: A prognostic biomarker CENPW and its relationship to immune infiltrations in clear cell renal cell carcinoma
Source: Research Square preprint supplement (doi:10.21203/rs.3.rs-2715408/v1), 2023-03-23
Supplement: Supplementary file 2 [file 47460b227448bf62a0d8fd8d.docx]

**Table 3**：CENPW expressiona associated with clinical pathological characteristics (logistic regression).

| Characteristics | Total(N) | Odds Ratio(OR) | P value |
| --- | --- | --- | --- |
| T stage (T3&T4 vs. T1&T2) | 539 | 2.198 (1.534-3.167) | <0.001 |
| N stage (N1 vs. N0) | 257 | 6.605 (1.795-42.643) | 0.014 |
| M stage (M1 vs. M0) | 506 | 2.394 (1.449-4.051) | <0.001 |
| Pathologic stage (Stage III&Stage IV vs. Stage I&Stage II) | 536 | 2.374 (1.664-3.405) | <0.001 |
| Histologic grade (G3&G4 vs. G1&G2) | 531 | 2.271 (1.606-3.224) | <0.001 |
| Age (>60 vs. <=60) | 539 | 1.053 (0.751-1.477) | 0.763 |
| Gender (Male vs. Female) | 539 | 1.398 (0.979-2.000) | 0.066 |
