# Supplementary material for: A prognostic biomarker CENPW and its relationship to immune infiltrations in clear cell renal cell carcinoma
Source: Research Square preprint supplement (doi:10.21203/rs.3.rs-2715408/v1), 2023-03-23
Supplement: Supplementary file 3 [file 9bfbaf19968dff9abc413d35.docx]

Table 2: The most significant signaling pathways associated with CENPW expression.

| **Description** | | **NES** | **P-value** | **P-adjust** |
| --- | --- | --- | --- | --- |
| Positive GO term | GO_IMMUNOGLOBULIN_COMPLEX | 2.8883 | 0.0001 | 0.0039 |
| GO_IMMUNOGLOBULIN_COMPLEX_CIRCULATING | 2.6985 | 0.0001 | 0.0039 |
| GO_IMMUNOGLOBULIN_RECEPTOR_BINDING | 2.6555 | 0.0001 | 0.0039 |
| GO_CELL_FATE_SPECIFICATION_INVOLVED_IN_PATTERN_SPECIFICATION | 2.0607 | 0.0001 | 0.0040 |
| GO_PHOSPHOLIPID_EFFLUX | 1.9716 | 0.0001 | 0.0040 |
| Negative GO term | GO_PHOSPHATIDYLINOSITOL_3_PHOSPHATE_BIOSYNTHETIC_PROCESS | -2.4406 | 0.0005 | 0.0098 |
| GO_1_PHOSPHATIDYLINOSITOL_3_KINASE_ACTIVITY | -2.2292 | 0.0012 | 0.0191 |
| GO_IMMATURE_B_CELL_DIFFERENTIATION | -2.0996 | 0.0012 | 0.0191 |
| GO_NEGATIVE_REGULATION_OF_CELL_CELL_ADHESION_MEDIATED_BY_CADHERIN | -2.0291 | 0.0020 | 0.0265 |
| GO_REGULATION_OF_TUBULIN_DEACETYLATION | -2.0256 | 0.0020 | 0.0265 |
| Positive KEGG term | KEGG_COMPLEMENT_AND_COAGULATION_CASCADES | 1.9957 | 0.0001 | 0.0042 |
| KEGG_ALPHA_LINOLENIC_ACID_METABOLISM | 1.8880 | 0.0004 | 0.0099 |
| KEGG_LINOLEIC_ACID_METABOLISM | 1.8270 | 0.0005 | 0.0116 |
| KEGG_PRIMARY_IMMUNODEFICIENCY | 1.7611 | 0.0010 | 0.0187 |
| KEGG_MATURITY_ONSET_DIABETES_OF_THE_YOUNG | 1.6909 | 0.0028 | 0.0328 |
| Negative KEGG term | KEGG_PROPANOATE_METABOLISM | -2.6631 | 0.0008 | 0.0164 |
| KEGG_VALINE_LEUCINE_AND_ISOLEUCINE_DEGRADATION | -2.4827 | 0.0011 | 0.0195 |
| KEGG_CIRCADIAN_RHYTHM_MAMMAL | -1.9896 | 0.0036 | 0.0360 |
| KEGG_CITRATE_CYCLE_TCA_CYCLE | -1.9803 | 0.0016 | 0.0232 |
| KEGG_FATTY_ACID_METABOLISM | -1.8706 | 0.0021 | 0.0273 |
