# Supplementary material for: A prognostic biomarker CENPW and its relationship to immune infiltrations in clear cell renal cell carcinoma
Source: Research Square preprint supplement (doi:10.21203/rs.3.rs-2715408/v1), 2023-03-23
Supplement: Supplementary file 4 [file c77423bd43aa2804e18ea4c9.docx]

Table1：Patient characteristics and clinicopathological characteristics of TCGA-KIRC patients with clear cell renal cell carcinoma.

| Characteristic | levels | Low expression of CENPW | High expression of CENPW | p |
| --- | --- | --- | --- | --- |
| n |  | 269 | 270 |  |
| T stage, n (%) | T1 | 163 (30.2%) | 115 (21.3%) | < 0.001 |
|  | T2 | 35 (6.5%) | 36 (6.7%) |  |
|  | T3 | 69 (12.8%) | 110 (20.4%) |  |
|  | T4 | 2 (0.4%) | 9 (1.7%) |  |
| N stage, n (%) | N0 | 117 (45.5%) | 124 (48.2%) | 0.011 |
|  | N1 | 2 (0.8%) | 14 (5.4%) |  |
| M stage, n (%) | M0 | 227 (44.9%) | 201 (39.7%) | 0.001 |
|  | M1 | 25 (4.9%) | 53 (10.5%) |  |
| Pathologic stage, n (%) | Stage I | 160 (29.9%) | 112 (20.9%) | < 0.001 |
|  | Stage II | 33 (6.2%) | 26 (4.9%) |  |
|  | Stage III | 50 (9.3%) | 73 (13.6%) |  |
|  | Stage IV | 26 (4.9%) | 56 (10.4%) |  |
| Gender, n (%) | Female | 103 (19.1%) | 83 (15.4%) | 0.080 |
|  | Male | 166 (30.8%) | 187 (34.7%) |  |
| OS event, n (%) | Alive | 214 (39.7%) | 152 (28.2%) | < 0.001 |
|  | Dead | 55 (10.2%) | 118 (21.9%) |  |
| Histologic grade, n (%) | G1 | 14 (2.6%) | 0 (0%) | < 0.001 |
|  | G2 | 137 (25.8%) | 98 (18.5%) |  |
|  | G3 | 96 (18.1%) | 111 (20.9%) |  |
|  | G4 | 18 (3.4%) | 57 (10.7%) |  |
| Age, n (%) | <=60 | 136 (25.2%) | 133 (24.7%) | 0.830 |
|  | >60 | 133 (24.7%) | 137 (25.4%) |  |
